# Supplementary material for: Juvenile hormone regulation of Drosophila aging
Source: PubMed Central journal article supplement (PMC3726347; doi:10.1186/1741-7007-11-85), 2013-07-17
Supplement: 1741-7007-11-85-S4.pdf [file 1741-7007-11-85-S4.pdf]

Table S2

| <b>Group 1: Genes repressed by JH in both fertile and sterile females</b> |                                  |             |             |                  |                         |                          |                         |                          |
|---------------------------------------------------------------------------|----------------------------------|-------------|-------------|------------------|-------------------------|--------------------------|-------------------------|--------------------------|
| <b>Gene Symbol</b>                                                        | <b>Normalized mRNA abundance</b> |             |             |                  | <b>Fold change</b>      |                          | <b>p-value</b>          |                          |
|                                                                           | <b>wildtype</b>                  | <b>CAKO</b> | <b>OvoD</b> | <b>OvoD;CAKO</b> | <b>wildtype v. CAKO</b> | <b>OvoD v. OvoD;CAKO</b> | <b>wildtype v. CAKO</b> | <b>OvoD v. OvoD;CAKO</b> |
| CG1304                                                                    | 2.754                            | 7.309       | 2.994       | 9.173            | 2.654                   | 3.064                    | 0.0001                  | 0.0002                   |
| CG34040                                                                   | 4.677                            | 11.286      | 10.287      | 12.569           | 2.413                   | 1.222                    | 0.0005                  | 0.0032                   |
| CG2444                                                                    | 2.454                            | 5.625       | 5.754       | 6.959            | 2.292                   | 1.210                    | 0.0007                  | 0.0026                   |
| Obp99b                                                                    | 4.161                            | 9.070       | 8.401       | 11.636           | 2.180                   | 1.385                    | 0.0009                  | 0.0103                   |
| CG6012                                                                    | 2.861                            | 6.140       | 4.419       | 8.099            | 2.146                   | 1.833                    | 0.0003                  | 0.0032                   |
| CG31955                                                                   | 3.374                            | 6.932       | 6.196       | 7.659            | 2.055                   | 1.236                    | 0.0014                  | 0.0157                   |
| Sr-CIV                                                                    | 2.254                            | 4.151       | 4.171       | 6.735            | 1.841                   | 1.615                    | 0.0016                  | 0.0018                   |
| w                                                                         | 3.181                            | 5.737       | 6.289       | 7.511            | 1.804                   | 1.194                    | 0.0086                  | 0.0247                   |
| CG18302                                                                   | 3.521                            | 6.194       | 5.740       | 8.115            | 1.759                   | 1.414                    | 0.0005                  | 0.0009                   |
| CG15534                                                                   | 4.686                            | 7.842       | 8.273       | 10.069           | 1.673                   | 1.217                    | 0.0057                  | 0.0023                   |
| Cpr60D                                                                    | 2.761                            | 4.613       | 5.566       | 6.368            | 1.671                   | 1.144                    | 0.0057                  | 0.0337                   |
| Acp65Aa                                                                   | 3.275                            | 5.339       | 4.795       | 7.087            | 1.631                   | 1.478                    | 0.0055                  | 0.0017                   |
| Cyp309a1                                                                  | 5.274                            | 8.585       | 9.143       | 10.700           | 1.628                   | 1.170                    | 0.0021                  | 0.0019                   |
| CG33282                                                                   | 3.095                            | 4.970       | 5.421       | 7.176            | 1.606                   | 1.324                    | 0.0390                  | 0.0021                   |
| CR13656                                                                   | 3.673                            | 5.667       | 5.865       | 7.970            | 1.543                   | 1.359                    | 0.0079                  | 0.0039                   |
| CG10559                                                                   | 3.950                            | 6.083       | 7.950       | 9.657            | 1.540                   | 1.215                    | 0.0003                  | 0.0070                   |
| CG11893                                                                   | 4.172                            | 6.311       | 5.898       | 8.180            | 1.513                   | 1.387                    | 0.0024                  | 0.0148                   |
| CG12998                                                                   | 5.743                            | 8.502       | 8.588       | 10.091           | 1.481                   | 1.175                    | 0.0028                  | 0.0000                   |
| CG12256                                                                   | 3.361                            | 4.895       | 5.488       | 6.939            | 1.456                   | 1.264                    | 0.0067                  | 0.0070                   |
| Try29F                                                                    | 7.237                            | 10.367      | 9.244       | 12.123           | 1.433                   | 1.311                    | 0.0029                  | 0.0001                   |
| CG6385                                                                    | 3.661                            | 5.129       | 4.831       | 6.395            | 1.401                   | 1.324                    | 0.0349                  | 0.0082                   |
| CG15533                                                                   | 4.093                            | 5.593       | 7.992       | 8.913            | 1.367                   | 1.115                    | 0.0115                  | 0.0219                   |
| CG7135                                                                    | 4.235                            | 5.559       | 5.461       | 7.283            | 1.312                   | 1.334                    | 0.0006                  | 0.0012                   |
| Cyp313a1                                                                  | 7.730                            | 10.140      | 9.334       | 10.947           | 1.312                   | 1.173                    | 0.0003                  | 0.0002                   |
| CG1208                                                                    | 7.904                            | 10.266      | 9.657       | 11.370           | 1.299                   | 1.177                    | 0.0014                  | 0.0001                   |
| Ser6                                                                      | 7.536                            | 9.725       | 8.831       | 10.848           | 1.291                   | 1.228                    | 0.0002                  | 0.0017                   |
| yellow-b                                                                  | 5.457                            | 7.023       | 7.829       | 8.634            | 1.287                   | 1.103                    | 0.0070                  | 0.0129                   |
| DsimCG6640                                                                | 8.669                            | 10.866      | 11.732      | 12.966           | 1.253                   | 1.105                    | 0.0287                  | 0.0316                   |
| CG31370                                                                   | 4.653                            | 5.787       | 6.509       | 7.208            | 1.244                   | 1.107                    | 0.0049                  | 0.0045                   |
| CG5724                                                                    | 8.874                            | 10.847      | 11.483      | 12.650           | 1.222                   | 1.102                    | 0.0081                  | 0.0004                   |
| Sodh-2                                                                    | 6.403                            | 7.708       | 7.756       | 9.017            | 1.204                   | 1.163                    | 0.0095                  | 0.0005                   |
| CG13856                                                                   | 4.481                            | 5.363       | 5.475       | 7.115            | 1.197                   | 1.300                    | 0.0045                  | 0.0012                   |
| Fuca                                                                      | 6.138                            | 7.323       | 7.982       | 8.794            | 1.193                   | 1.102                    | 0.0055                  | 0.0119                   |
| Cyp12d1-d                                                                 | 6.038                            | 7.173       | 6.597       | 8.476            | 1.188                   | 1.285                    | 0.0087                  | 0.0009                   |
| CG32982                                                                   | 3.615                            | 4.278       | 4.164       | 5.054            | 1.183                   | 1.214                    | 0.0190                  | 0.0164                   |
| sxe2                                                                      | 4.992                            | 5.902       | 6.507       | 7.837            | 1.182                   | 1.204                    | 0.0142                  | 0.0154                   |
| CG13177                                                                   | 4.988                            | 5.890       | 6.288       | 6.990            | 1.181                   | 1.112                    | 0.0234                  | 0.0461                   |
| Cpr66D                                                                    | 7.253                            | 8.550       | 7.656       | 9.238            | 1.179                   | 1.207                    | 0.0319                  | 0.0004                   |
| CG11668                                                                   | 2.722                            | 3.201       | 3.547       | 4.114            | 1.176                   | 1.160                    | 0.0351                  | 0.0258                   |



Table S2

|             |       |       |        |        |       |       |        |        |
|-------------|-------|-------|--------|--------|-------|-------|--------|--------|
|             |       |       |        |        |       |       |        |        |
| Pde1c       | 5.032 | 4.253 | 6.288  | 5.370  | 1.183 | 1.171 | 0.0007 | 0.0011 |
| CG2022      | 7.386 | 6.274 | 9.039  | 7.561  | 1.177 | 1.196 | 0.0247 | 0.0020 |
| CG11912     | 9.594 | 8.167 | 11.179 | 10.069 | 1.175 | 1.110 | 0.0108 | 0.0053 |
| CG4822      | 9.376 | 7.989 | 10.468 | 9.305  | 1.174 | 1.125 | 0.0000 | 0.0077 |
| CG34005     | 7.177 | 6.201 | 8.742  | 7.717  | 1.157 | 1.133 | 0.0278 | 0.0267 |
| CG31759     | 5.567 | 4.825 | 4.611  | 3.890  | 1.154 | 1.185 | 0.0139 | 0.0023 |
| phr6-4      | 7.952 | 6.934 | 4.093  | 3.029  | 1.147 | 1.351 | 0.0007 | 0.0356 |
| Drep-2      | 3.613 | 3.179 | 2.543  | 2.262  | 1.137 | 1.124 | 0.0399 | 0.0668 |
| CG13912     | 9.291 | 8.177 | 9.953  | 8.991  | 1.136 | 1.107 | 0.0033 | 0.0021 |
| Cyp4ac3     | 6.945 | 6.116 | 8.201  | 7.307  | 1.136 | 1.122 | 0.0047 | 0.0019 |
| SCAP        | 9.752 | 8.614 | 9.538  | 8.361  | 1.132 | 1.141 | 0.0067 | 0.0225 |
| Invadolysin | 7.103 | 6.324 | 7.819  | 6.502  | 1.123 | 1.203 | 0.0382 | 0.0072 |
|             |       |       |        |        |       |       |        |        |
| CG9616      | 2.646 | 2.373 | 7.507  | 3.434  | 1.115 | 2.186 | 0.0342 | 0.0087 |
| CG33120     | 7.558 | 6.820 | 9.928  | 8.830  | 1.108 | 1.124 | 0.0269 | 0.0207 |
| nimC1       | 6.181 | 5.594 | 9.066  | 8.013  | 1.105 | 1.131 | 0.0008 | 0.0018 |
| Cyp4ad1     | 7.583 | 6.867 | 8.952  | 8.097  | 1.104 | 1.106 | 0.0195 | 0.0039 |
| CG30438     | 5.213 | 4.723 | 8.633  | 6.153  | 1.104 | 1.403 | 0.0275 | 0.0004 |
| caps        | 2.727 | 2.472 | 3.304  | 2.803  | 1.103 | 1.178 | 0.0230 | 0.0077 |
